# Supplementary material
Source: PubMed Central journal article supplement (PMC3488892)
Supplement: supp_blood-2011-06-361642_blood-2011-06-361642-1.pdf [file supp_blood-2011-06-361642_blood-2011-06-361642-1.pdf]

**Supplemental Table 1. Two-tube multiplex primer sequences and concentrations for  $\alpha$ -globin gene deletion or duplication screening in the Silent Cerebral Infarct Transfusion Trial**

| <b>Set 1*</b> | <b>Concentration</b> | <b>Sequence</b>                         |
|---------------|----------------------|-----------------------------------------|
| 3.7-R1        | 0.1uM                | ATG AGA GAA ATG TTC TGG CAC CTG CAC TTG |
| 3.7-R2        | 0.1uM                | TCC ATC CCC TCC TCC CGC CCC TGC CTT TTC |
| 3.7-F         | 0.4uM                | AAG TCC ACC CCT TCC TTC CTC ACC         |
| <b>Set 2†</b> | <b>Concentration</b> | <b>Sequence</b>                         |
| 20.5-F        | 0.3uM                | GCC CAA CAT CCG GAG TAC ATG             |
| a2-R          | 0.3uM                | AGA CCA GGA AGG GCC GGT G               |
| 4.2-F         | 0.5uM                | GGT TTA CCC ATG TGG TGC CTC             |
| 4.2-R         | 0.5uM                | CCC GTT GGA TCT TCT CAT TTC CC          |
| SEA-F         | 0.2uM                | CGA TCT GGG CTC TGT GTT CTC             |
| SEA-R         | 0.2uM                | AGC CCA CGT TGT GTT CAT GGC             |
| THAI-F        | 0.3uM                | GAC CAT TCC TCA GCG TGG GTG             |
| THAI-R        | 0.3uM                | CAA GTG GGC TGA GCC CTT GAG             |
| MED-F         | 0.2uM                | TAC CCT TTG CAA GCA CAC GTA C           |
| MED-R         | 0.2uM                | TCA ATC TCC GAC AGC TCC GAC             |
| FIL-F         | 1.0uM                | TTT AAA TGG GCA AAA CAG GCC AGG         |
| FIL-R         | 1.0uM                | ATA ACC TTT ATC TGC CAC ATG TAG C       |
| 3.7-F         | 0.4uM                | AAG TCC ACC CCT TCC TTC CTC ACC         |

\* Primers adapted from Liu *et al.*<sup>1</sup>

† Primers adapted from Tan *et al.*<sup>2</sup>

1 Liu YT, Old JM, Miles K, Fisher CA, Weatherall DJ, Clegg JB. Rapid detection of alpha-thalassaemia deletions and alpha-globin gene triplication by multiplex polymerase chain reactions. *Br J Haematol.* 2000;108(2):295-299.

2 Tan AS, Quah TC, Low PS, Chong SS. A rapid and reliable 7-deletion multiplex polymerase chain reaction assay for alpha-thalassemia. *Blood.* 2001;98(1):250-251.
